# Supplementary material for: The Laurentide Ice Sheet in southern New England and New York during and at the end of the Last Glacial Maximum: a cosmogenic-nuclide chronology
Source: Copernicus journal article supplement (doi:10.5194/cp-20-2167-2024), 2024-09-26
Supplement: Supplementary file 1 [file cp-20-2167-2024-supplement.zip]

## Sheet: Sheet1
Table S2 - New and previously reported 10Be and 26Al exposure ages in southern New England and New York.
		Borchers et al. (2016) Production Rate								NENA Production Rate (Balco et al., 2009)
Sample ID	Sample type	10Be Age LSDn scaling (yrs)	10Be age internal error LSDn Scaling (yrs)	26Al Age LSDn scaling (yrs)	26Al age internal error LSDn Scaling (yrs)	10Be Age St scaling (yrs)	10Be age internal error St Scaling (yrs)	26Al Age St scaling (yrs)	26Al age internal error St Scaling (yrs)	10Be Age LSDn scaling (yrs)	10Be age internal error LSDn Scaling (yrs)	10Be Age St scaling (yrs)	10Be age internal error St Scaling (yrs)	Included in landform age reported in main text Table 2?	Reference
Connecticut Lobe
Ronkonkoma Moriane, Long Island, NY
LI-10	boulder	22425	751	-	-	21550	722	-	-	22329	748	21835	732	yes	This study
LI-11	boulder	20693	677	-	-	19704	645	-	-	20605	675	19964	653	yes	This study
LI-13	boulder	21087	710	-	-	20118	677	-	-	20998	707	20384	686	yes	This study
LI-14	boulder	19069	759	-	-	18045	718	-	-	18987	755	18283	727	yes	This study
Roanoke Point Moraine, Long Island, NY
LI-1	boulder	20098	971	-	-	19120	923	-	-	20012	967	19373	936	yes	This study
LI-3	boulder	19807	598	-	-	18834	569	-	-	19722	596	19083	576	yes	This study
LI-4	boulder	18254	580	-	-	17272	549	-	-	18174	577	17500	556	yes	This study
LI-6A	boulder	18942	670	-	-	17957	635	-	-	18859	667	18194	643	yes	This study
LI-6B	boulder	18274	523	-	-	17287	495	-	-	18193	521	17515	502	yes	This study
LI-7	boulder	18179	566	-	-	17202	535	-	-	18098	563	17429	542	yes	This study
LI-8	boulder	20894	656	-	-	19977	627	-	-	20807	653	20241	635	yes	This study
LI-9	boulder	14223	562	-	-	13290	525	-	-	14160	559	13465	532	no	This study
Charlestown Moraine, Rhode Island
GB2002-CH-1	boulder	17397	1615	-	-	16515	1532	-	-	17322	1608	16733	1553	no	This study
GB2002-CH-2	boulder	21814	766	-	-	21050	739	-	-	21724	763	21328	749	yes	This study
GB2002-CH-3	boulder	22237	1100	-	-	21499	1063	-	-	22143	1095	21783	1077	yes	This study
GB2002-CH-4	boulder	22521	771	-	-	21796	746	-	-	22423	768	22084	756	yes	This study
GB2002-CH-5	boulder	23748	1004	-	-	23057	975	-	-	23645	1000	23362	988	yes	This study
GB2002-CH-6	boulder	21871	1036	-	-	21120	1000	-	-	21781	1032	21399	1013	yes	This study
Narragansett-Buzzards Bay Lobe
Congdon Hill Moraine
GB2002-CO-1	boulder	21352	722	-	-	20592	696	-	-	21262	719	20864	705	yes	This study
GB2002-CO-2	boulder	20888	1049	-	-	20102	1009	-	-	20800	1044	20367	1022	yes	This study
GB2002-CO-3	boulder	19952	1196	-	-	19134	1147	-	-	19866	1191	19386	1162	yes	This study
Hudson Lobe
Harbor Hill Moraine, Staten Island, NY
SI-1	boulder	41630	2416	-	-	40730	2363	-	-	41456	2405	41271	2395	n/a	This study
SI-3	boulder	18902	2116	-	-	17793	1991	-	-	18820	2107	18028	2018	n/a	This study
Central Park, Manhattan, NY
UDP-2	bedrock	24971	749	-	-	24156	724	-	-	24863	745	24475	734	n/a	This study
UDP-3	bedrock	23191	802	-	-	22328	772	-	-	23089	798	22623	782	n/a	This study
UDP-4	boulder	20019	741	-	-	19013	704	-	-	19933	738	19264	713	n/a	This study
Lamont-Doherty Earth Observatory, Palisades, NY
LDEO-1	bedrock	28993	1763	-	-	28231	1716	-	-	28864	1755	28605	1739	n/a	This study
Harriman State Park, New York
HSP-1	boulder	20612	699	-	-	19745	670	-	-	20524	696	20006	679	yes	This study
HSP-2a	boulder	20336	677	-	-	19436	647	-	-	20248	674	19693	656	yes	This study
HSP-3	boulder	21512	674	-	-	20684	648	-	-	21423	671	20958	657	yes	This study
HSP-4	boulder	20309	769	-	-	19414	735	-	-	20221	766	19671	745	yes	This study
HSP-06-01	boulder	22791	841	-	-	22037	813	-	-	22691	837	22329	823	yes	This study
HSP-06-04	boulder	19075	728	-	-	18150	692	-	-	18993	725	18391	702	yes	This study
HSP-06-05	boulder	20204	636	-	-	19307	607	-	-	20116	633	19562	615	yes	This study
HSP-06-06	boulder	18698	694	-	-	17767	660	-	-	18616	691	18002	668	yes	This study
Black Rock Forest
BRF-1	bedrock	25045	656	-	-	24444	640	-	-	24936	653	24769	649	n/a	This study
BRF-2	bedrock	102423	2911	-	-	101388	2880	-	-	101975	2898	102759	2920	n/a	This study
BRF-3	boulder	22110	819	-	-	21453	794	-	-	22018	815	21738	805	n/a	This study
BRF-4	boulder	23688	798	-	-	23085	778	-	-	23586	795	23391	788	n/a	This study
BRF-19-01	bedrock	101073	3022	-	-	99939	2987	-	-	100628	3008	101291	3029	n/a	This study
Previously Published Ages
Connecticut Lobe
Martha's Vineyard Moraine, Massachusetts
GB2002-MV2-27-4	boulder	17625	740	17442	873	16743	703	16778	840	17547	737	16964	712	no	Balco et al., 2002
GB2002-MV3-07-3	boulder	22029	811	20999	1261	21265	782	20433	1226	21937	807	21546	793	yes	Balco et al., 2002
GB2002-PH-1	boulder	28326	859	25631	1138	27682	839	25286	1123	28201	855	28048	850	yes	Balco et al., 2002
GB2002-WR-2	boulder	28582	839	27275	1557	27978	822	27015	1542	28454	836	28349	833	yes	Balco et al., 2002
GB2002-WR-3	boulder	28440	1090	22115	6504	27834	1067	21654	6367	28314	1085	28203	1081	yes	Balco et al., 2002
GB2002-WR-4	boulder	29198	843	26528	1124	28629	826	26302	1114	29068	839	29008	837	yes	Balco et al., 2002
GB2002-WR-5	boulder	24905	721	23212	1131	24243	702	22803	1111	24797	718	24563	711	yes	Balco et al., 2002
GB2002-WR-6	boulder	26261	1015	24263	964	25644	991	23899	950	26147	1010	25983	1004	yes	Balco et al., 2002
GB2002-MV2-27-2	boulder	63357	1591	60418	5378	61373	1541	59030	5251	63092	1584	62192	1561	no	Balco et al., 2002
GB2002-MV2-27-3	boulder	24463	650	23829	1545	23793	632	23455	1521	24355	647	24107	640	yes	Balco et al., 2002
GB2002-MV2-27-1	boulder	32724	847	35327	1441	31997	828	35034	1429	32555	842	32421	839	no	Balco et al., 2002
GB2002-MV3-07-1	boulder	-	-	25963	903	-	-	25671	893	-	-	-	-	yes	Balco et al., 2002
GB2002-MV3-07-2	boulder	55960	1412	53455	2911	53898	1360	52332	2848	55695	1406	54616	1378	no	Balco et al., 2002
Buzzards Bay Moraine, Massachusetts
GB2002-BB2-21-1	boulder	18690	775	18504	1148	17874	741	17926	1112	18609	772	18110	751	yes	Balco et al., 2002
GB2002-BB2-29-1	boulder	21468	947	21511	784	20739	915	21070	767	21379	943	21013	927	yes	Balco et al., 2002
GB2002-BB2-29-2	boulder	20575	1459	22360	4315	19795	1403	21990	4243	20487	1452	20057	1422	yes	Balco et al., 2002
GB2002-BB2-24-1	boulder	20494	726	19972	894	19705	698	19429	869	20406	723	19965	708	yes	Balco et al., 2002
GB2002-BB2-24-2	boulder	19683	794	20521	951	18870	761	20002	926	19598	790	19119	771	yes	Balco et al., 2002
GB2002-BB3-12-1	boulder	19429	977	20341	1437	18623	936	19828	1400	19345	972	18868	948	yes	Balco et al., 2002
GB2002-BB3-12-2	boulder	21786	1085	22714	872	21079	1050	22359	859	21695	1080	21357	1064	yes	Balco et al., 2002
GB2002-BB3-06-1	boulder	20756	681	24841	2203	19990	656	24588	2180	20668	678	20254	665	yes	Balco et al., 2002
GB2002-BB3-06-2	boulder	21962	738	23502	1240	21280	715	23186	1224	21871	735	21561	724	yes	Balco et al., 2002
GB2002-BB3-06-3	boulder	21437	940	22573	1903	20715	908	22225	1874	21348	936	20989	920	yes	Balco et al., 2002
Old Saybrook Moraine, Connecticut
GB2006-OS-1	boulder	21626	604	-	-	20857	582	-	-	21536	601	21132	590	yes	Balco and Schaefer, 2006
GB2006-OS-2	boulder	20990	612	-	-	20183	588	-	-	20902	609	20449	596	yes	Balco and Schaefer, 2006
GB2006-OS-3	boulder	20255	763	-	-	19416	731	-	-	20167	760	19673	741	yes	Balco and Schaefer, 2006
GB2006-OS-4	boulder	19989	525	-	-	19142	503	-	-	19903	523	19394	510	yes	Balco and Schaefer, 2006
GB2006-OS-5	boulder	22266	585	-	-	21552	566	-	-	22171	582	21837	573	yes	Balco and Schaefer, 2006
GB2006-OS-6	boulder	20935	504	-	-	20134	484	-	-	20847	502	20400	491	yes	Balco and Schaefer, 2006
GB2006-OS-7	boulder	21924	576	-	-	21178	556	-	-	21833	574	21457	564	yes	Balco and Schaefer, 2006
Ledyard Moraine, Connecticut
GB2006-LD-1	boulder	21405	617	-	-	20598	594	-	-	21316	614	20870	601	yes	Balco and Schaefer, 2006
GB2006-LD-2	boulder	20645	589	-	-	19794	565	-	-	20557	587	20056	572	yes	Balco and Schaefer, 2006
GB2006-LD-3	boulder	22172	682	-	-	21421	658	-	-	22079	679	21704	667	yes	Balco and Schaefer, 2006
GB2006-LD-4	boulder	20953	525	-	-	20121	504	-	-	20864	523	20387	511	yes	Balco and Schaefer, 2006
GB2006-LD-5	boulder	21020	744	-	-	20194	714	-	-	20932	740	20461	724	yes	Balco and Schaefer, 2006
GB2006-LD-6	boulder	20229	543	-	-	19377	520	-	-	20142	541	19632	527	yes	Balco and Schaefer, 2006
GB2006-LD-7	boulder	21816	677	-	-	21050	653	-	-	21726	675	21329	662	yes	Balco and Schaefer, 2006
Hudson Lobe
Budd Lake Moraine, New Jersey
SAF-10	boulder	25690	754	23968	702	24938	732	23407	685	25577	751	25268	742	yes	Corbett et al., 2017
SAF-11	boulder	26355	731	23626	717	25629	711	23048	699	26242	728	25968	720	yes	Corbett et al., 2017
SAF-12	boulder	27263	1198	28049	1401	26525	1166	27616	1379	27139	1193	26876	1181	yes	Corbett et al., 2017
SAF-13	boulder	24590	753	23718	1361	23784	728	23134	1327	24483	749	24098	738	yes	Corbett et al., 2017
SAF-14	boulder	28374	990	25798	1563	27614	963	25298	1532	28248	986	27981	976	yes	Corbett et al., 2017
SMH-9	boulder	22270	587	21420	517	21391	564	20711	500	22175	584	21675	571	yes	Corbett et al., 2017
SPA-1	boulder	25730	918	23702	926	25006	892	23150	904	25616	914	25337	904	yes	Corbett et al., 2017
SPA-2	boulder	27010	866	25265	1051	26304	843	24788	1031	26883	862	26653	854	yes	Corbett et al., 2017
SPA-3	boulder	25551	751	22370	1359	24823	729	21770	1323	25440	748	25152	739	yes	Corbett et al., 2017
SPA-4	boulder	25855	817	23625	862	25134	794	23069	841	25741	813	25468	804	yes	Corbett et al., 2017
SPA-5	boulder	23699	733	20873	775	22904	708	20152	748	23597	730	23207	717	yes	Corbett et al., 2017
SPA-6-DUP	boulder	23744	786	20038	1473	22951	760	19277	1417	23642	783	23255	770	yes	Corbett et al., 2017
SPA-15	boulder	28934	935	24377	1294	28242	913	23853	1266	28805	931	28616	925	yes	Corbett et al., 2017
SPA-16	boulder	28757	904	28409	939	28063	882	28011	926	28628	900	28435	894	yes	Corbett et al., 2017
SWR-7	boulder	23732	1218	23085	1095	22974	1179	22538	1069	23629	1212	23278	1194	yes	Corbett et al., 2017
SWR-8	boulder	23383	1133	23031	1095	22616	1096	22483	1069	23280	1128	22915	1111	yes	Corbett et al., 2017
Peekamoose Mountain, Catskill Mountains
CAT-01	boulder	19633	434	-	-	19673	435	-	-	19549	433	19935	441	n/a	Halsted et al., 2022
CAT-02	boulder	19448	590	-	-	19462	590	-	-	19363	587	19721	598	n/a	Halsted et al., 2022
CAT-03	boulder	19277	501	-	-	19239	500	-	-	19193	499	19495	507	n/a	Halsted et al., 2022
CAT-04	boulder	18520	552	-	-	18217	543	-	-	18439	550	18459	550	n/a	Halsted et al., 2022
CAT-05	boulder	18247	518	-	-	17928	509	-	-	18166	516	18166	516	n/a	Halsted et al., 2022
