# Supplementary material for: The Laurentide Ice Sheet in southern New England and New York during and at the end of the Last Glacial Maximum: a cosmogenic-nuclide chronology
Source: Copernicus journal article supplement (doi:10.5194/cp-20-2167-2024), 2024-09-26
Supplement: Supplementary file 2 [file cp-20-2167-2024-supplement.zip]

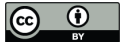

## *Supplement of*

# **The Laurentide Ice Sheet in southern New England and New York during and at the end of the Last Glacial Maximum: a cosmogenic-nuclide chronology**

**Allie Balter-Kennedy et al.**

*Correspondence to:* Allie Balter-Kennedy (abalter@ldeo.columbia.edu)

- cp-20-2167-2024-supplement-title-page.pdf
- Balter-Kennedy et al. - Southeastern Laurentide - Climate of the Past - Supplement File.pdf
- TableS1 - Be-10Data.xlsx
- TableS2 - AllAges.xlsx
- TableS3 - MoraineAgesNENA.xlsx

The copyright of individual parts of the supplement might differ from the article licence.
