# Supplementary material for: The Laurentide Ice Sheet in southern New England and New York during and at the end of the Last Glacial Maximum: a cosmogenic-nuclide chronology
Source: Copernicus journal article supplement (doi:10.5194/cp-20-2167-2024), 2024-09-26
Supplement: Supplementary file 2 [file TableS1 - Be-10Data.xlsx]

## Sheet: Sheet1
Table S1 - Analytical information for new 10Be measurements.
Sample ID	Run Date	Sample wt. (g)	Carrier wt. (g)	9Be carrier concentration (ppm)	10Be/9Be Ratio	10Be/9Be Ratio Error	Blank 10Be Atoms	Blank 10Be Atoms Error	Blank-corrected 10Be (atoms/g)	Blank-corrected 10Be error (atoms/g)	Standard
BRF 1	September 2005	10.0192	0.2465	985	8.94828e-14	1.88342e-15	7875.49	2072.78	144118	3751.64	KNSTD
BRF 2	September 2005	10.0196	0.2463	985	3.81494e-13	8.86288e-15	7875.49	2072.78	616460	17074.1	KNSTD
BRF 3	September 2005	10.0568	0.2478	985	8.30323e-14	2.76977e-15	7875.49	2072.78	133879	4930.84	KNSTD
BRF 4	November 2005	5.0108	0.1975	986	5.57772e-14	1.61658e-15	13726.5	2732.09	142109	4759.51	KNSTD
BRF-19-01	July 2019	10.032	0.1988	1027	4.06023e-13	1.01444e-14	0	0	552166	16094.7	07KNSTD
GB2002-CH-1	July 2007	7.8528	0.1997	996	3.87287e-14	3.49923e-15	8337.16	3745.77	64487.1	6024.27	07KNSTD
GB2002-CH-2	July 2007	10.0865	0.1974	996	6.26139e-14	2.06397e-15	8337.16	3745.77	80729.5	2977.63	07KNSTD
GB2002-CH-3	July 2007	10.0323	0.2007	996	6.29203e-14	2.99507e-15	8337.16	3745.77	82944.4	4198.9	07KNSTD
GB2002-CH-4	July 2007	10.0965	0.1991	996	6.47728e-14	2.07879e-15	8337.16	3745.77	84184.6	3035.09	07KNSTD
GB2002-CH-5	July 2007	10.0227	0.1994	996	6.85821e-14	2.76906e-15	8337.16	3745.77	89977.4	3930.22	07KNSTD
GB2002-CH-6	July 2007	10.061	0.2007	996	6.01168e-14	2.73287e-15	8337.16	3745.77	78985.6	3839.87	07KNSTD
GB2002-CO-1	July 2007	10.01	0.1959	996	6.29745e-14	1.99158e-15	8337.16	3745.77	81191.6	2896.04	07KNSTD
GB2002-CO-2	July 2007	8.077	0.201	996	4.84714e-14	2.33472e-15	8337.16	3745.77	79248.3	4077.63	07KNSTD
GB2002-CO-3	July 2007	10.1169	0.1995	996	5.62732e-14	3.26981e-15	8337.16	3745.77	73030.3	4448.77	07KNSTD
HSP 1	November 2005	5.0174	0.1971	986	4.57158e-14	1.32579e-15	13726.5	2732.09	115588	3902.41	KNSTD
HSP 2a	November 2005	5.0244	0.1969	986	4.36576e-14	1.2328e-15	13726.5	2732.09	109992	3645.98	KNSTD
HSP 3	November 2005	5.0069	0.1966	986	4.68447e-14	1.22379e-15	13726.5	2732.09	118450	3692.21	KNSTD
HSP 4	November 2005	5.091	0.1974	986	4.47669e-14	1.48938e-15	13726.5	2732.09	111670	4209.19	KNSTD
HSP-06-01	August 2006	5.0285	0.2007	996	4.84527e-14	1.57878e-15	8110	3179.01	127095	4661.11	KNSTD
HSP-06-04	July 2007	10.146	0.2026	996	7.11978e-14	2.45385e-15	5106.16	3555.53	94118.3	3574.77	07KNSTD
HSP-06-05	July 2007	10.0022	0.2014	996	7.48205e-14	2.02521e-15	5106.16	3555.53	99757.7	3123.92	07KNSTD
HSP-06-06	July 2007	10.0545	0.2007	996	7.00826e-14	2.33672e-15	5106.16	3555.53	92597.8	3423.23	07KNSTD
LDEO 1	November 2005	1.1008	0.1971	986	1.20677e-14	6.03962e-16	13726.5	2732.09	129895	7843.27	KNSTD
LI-1	July 2007	11.1342	0.1997	996	6.14634e-14	2.77333e-15	5106.16	3555.53	72910.7	3504.24	07KNSTD
LI-10	October 2006	10.1445	0.1984	996	7.28541e-14	2.12373e-15	8350.1	3818.84	94006.5	3132.29	KNSTD
LI-11	October 2006	10.1261	0.204	996	6.59408e-14	1.86196e-15	8350.1	3818.84	87589.4	2852.65	KNSTD
LI-13	July 2007	10.6616	0.2015	996	6.40814e-14	1.88613e-15	5106.16	3555.53	80126.4	2684.26	07KNSTD
LI-14	July 2007	7.7211	0.2006	996	4.19682e-14	1.49768e-15	5106.16	3555.53	71907.7	2847.39	07KNSTD
LI-3	July 2007	10.0617	0.2024	996	5.43843e-14	1.37769e-15	5106.16	3555.53	72302.6	2172.97	07KNSTD
LI-4	July 2007	10.2108	0.2016	996	5.01936e-14	1.35803e-15	5106.16	3555.53	65456.5	2070.38	07KNSTD
LI-6A	July 2007	10.1053	0.202	996	5.24132e-14	1.63248e-15	5106.16	3555.53	69225.1	2436.73	07KNSTD
LI-6B	July 2007	10.0227	0.2017	996	5.01443e-14	1.17334e-15	5106.16	3555.53	66652.3	1900.53	07KNSTD
LI-7	July 2007	10.5787	0.1997	996	5.24622e-14	1.38254e-15	5106.16	3555.53	65430.4	2027.2	07KNSTD
LI-8	October 2006	10.0721	0.204	996	6.2868e-14	1.67643e-15	8350.1	3818.84	83916.9	2621	KNSTD
LI-9	October 2006	10.0489	0.2032	996	4.22878e-14	1.48554e-15	8350.1	3818.84	56080.4	2207.41	KNSTD
SI-1	July 2006	5.8466	0.1972	996	8.57584e-14	3.15126e-15	48047.3	42796.2	184295	10582.6	KNSTD
SI-3	July 2006	5.1691	0.1968	996	3.52283e-14	1.18157e-15	48047.3	42796.2	79969.9	8905.5	KNSTD
UDP 2	August 2005	10.5238	0.252	985	6.72199e-14	1.62995e-15	27785.3	6219.34	103305	3078.7	KNSTD
UDP 3	August 2005	10.1732	0.2513	985	6.00861e-14	1.75342e-15	27785.3	6219.34	94962.1	3263.98	KNSTD
UDP-4	October 2006	10.0658	0.1997	996	6.16575e-14	2.02797e-15	8350.1	3818.84	80583.6	2968.17	KNSTD
