# Supplementary material for: The Laurentide Ice Sheet in southern New England and New York during and at the end of the Last Glacial Maximum: a cosmogenic-nuclide chronology
Source: Copernicus journal article supplement (doi:10.5194/cp-20-2167-2024), 2024-09-26
Supplement: Supplementary file 4 [file TableS3 - MoraineAgesNENA.xlsx]

## Sheet: Sheet1
Table S3 - Moraine ages calculated using the NENA production rate of Balco et al. (2009). All ages are 10Be only.
Moraine name	Distance from terminal moraine (km)	LSDn 10Be age (kyr)	LSDn 10Be age SD (kyr)	St 10Be age (kyr)	St 10Be age SD (kyr)	Coefficient of Variance (%)	Reduced χ2	Reference
Outer Terminal Limit
Budd Lake Moraine	0	25.6	2	25.3	2.1	0.078125	6.13	Corbett et al., 2017
Ronkonkoma Moraine	0	20.7	1.4	20.1	1.5	0.0676329	3.36	This study
Martha's Vineyard Moraine	0	26.4	2.5	26.2	2.6	0.1	9.91	Balco et al., 2002
Inner Terminal Limit
Roanoke Point Moraine	10 to 25	19.2	1.1	18.6	1.2	0.0572917	2.97	This study
Charlestown Moraine	28	22.3	0.8	22	0.8	0.03	0.67	This study
Buzzards Bay Moraine	8 to 30	20.5	1.1	20.1	1.1	0.05	1.12	Balco et al., 2002
Roanoke Point-Charlestown-Buzzards Bay Combined	8 to 30	21.7	0.9	21.4	1.1	0.04	1.01
Recessional Limit 1								Balco and Schaefer, 2006
Old Saybrook Moraine	35 to 43	21.1	0.8	20.6	0.9	0.0379147	2.1
Recessional Limit 2								Balco and Schaefer, 2006
Ledyard Moraine	44 to 46	21.1	0.7	20.6	0.7	0.0331754	1.21	This study
Congdon Hill Moraine	50	20.6	0.7	20.2	0.8	0.0339806	1.19	This study
Ledyard-Congdon Hill Combined	44 to 50	21	0.7	20.5	0.7	0.0333333	0.91
Minimum Limit
Harriman State Park (ice-marginal deposit)	40 to 50	20.4	1.3	19.8	1.4	0.0637255	2.92	This study
